# Supplementary material for: Paeoniflorin Ameliorates Cognitive Impairment in Parkinson’s Disease via JNK/p53 Signaling
Source: Research Square preprint supplement (doi:10.21203/rs.3.rs-1155409/v1), 2021-12-15
Supplement: Supplementary file 1 [file 4ff6bf77437ed517fcbb9ba5.xlsx]

## Sheet: score1
name	Betweenness	Closeness	Degree	Eigenvector	LAC	Network
ABCB1	84.7825	0.445104	15	0.11253	8.26667	9.11472
KDR	778.937	0.473186	26	0.145537	8.84615	13.8852
TP53	3628.01	0.576923	61	0.292382	12.9836	46.9528
EGFR	1721.39	0.535714	51	0.263939	12.6667	37.1689
AKR1B1	748.559	0.436047	15	0.0722396	4.4	6.56981
MGMT	87.862	0.438596	15	0.106529	8.13333	8.81169
CASP3	1278.69	0.522648	47	0.256302	13.2766	34.5489
HSP90AA1	2907.35	0.530035	49	0.230923	10.3265	30.0815
TOP1	66.912	0.432277	16	0.12031	10.125	11.0312
ABL1	104.65	0.432277	19	0.13263	10.1053	12.3201
SLC29A1	207.575	0.393701	12	0.0342192	3	4.771
MAPK8	93.8409	0.45045	21	0.142679	10.8571	14.5111
TNF	4169.23	0.541516	50	0.223486	10.08	32.3439
SYN	1141.13	0.520833	43	0.241438	12.8837	29.2006
HSPA8	698.218	0.457317	25	0.122666	7.28	13.2635
CYP2E1	293.636	0.426136	10	0.0659638	5.2	5.91667
PSD-95	424.075	0.462963	27	0.169169	12.2222	19.4893
CCNA2	149.731	0.436047	24	0.161637	12.9167	17.7598
EPHA2	17.293	0.402145	8	0.0657963	4.5	5.25
PTPRF	39.5952	0.357995	4	0.0223188	1.5	2
ACTA1	718.945	0.437318	12	0.0853236	5.66667	6.90909
MCL1	64.9176	0.445104	17	0.130977	9.76471	11
PTPN1	104.172	0.436047	12	0.0840132	5.66667	7.15152
AR	27.7518	0.445104	18	0.148972	12.2222	13.0118
IDH1	693.911	0.445104	18	0.0908667	5.11111	7.3312
HDAC1	714.675	0.457317	23	0.146096	9.47826	12.8501
ACADM	421.046	0.328947	7	0.0065981	1.42857	3.5
UQCRC1	0	0.248344	2	0.000356	1	2
FUCA1	30.1841	0.301205	3	0.00165614	0.666667	1
BCAT1	708.174	0.424929	12	0.0254745	1.66667	2.65758
TST	57.6669	0.326087	5	0.00588063	0.8	1
HSD17B4	322.909	0.382653	5	0.0182124	1.6	2.25
ETFDH	19.7524	0.283554	3	0.00115719	1.33333	2.5
MORF4L1	3.68718	0.323276	3	0.0122987	0.666667	1
VAV2	5.81845	0.364964	5	0.0287082	1.6	2
MYO6	298	0.306122	2	0.00393281	0	0
ADA	676.379	0.424929	17	0.035388	5.05882	9.32641
AHCY	398.067	0.415512	16	0.0381759	4.5	7.64405
ATIC	201.174	0.382653	13	0.0196229	4.46154	6.01364
ADK	523.678	0.390625	16	0.0198487	4.5	7.64827
ADORA2B	234.396	0.394737	8	0.0161681	2.25	2.8
SLC28A2	0.622222	0.32538	4	0.00557824	2.5	3.33333
IMPDH2	19.5845	0.35461	9	0.0105825	6	6.95833
ADORA2A	607.559	0.390625	6	0.0151369	2.66667	3.2
IMPDH1	597.415	0.344828	7	0.00669932	3.42857	4
PNP	316.616	0.406504	13	0.028186	4.92308	7.12121
ADORA3	113.527	0.397878	7	0.0254286	2	2.33333
GART	891.803	0.433526	21	0.0461773	5.14286	11.5087
MTAP	199.268	0.407609	9	0.0223032	4	5.025
CDA	90.7038	0.408719	9	0.0320544	3.55556	4.41667
ADAM17	261.272	0.407609	14	0.0658562	5.85714	8.36765
HBEGF	18.7758	0.428571	12	0.0950038	8.5	9.27273
MMP8	1.39281	0.38961	7	0.0582137	5.14286	6
NCSTN	1.03739	0.309917	7	0.0104067	5.71429	6.66667
MMP3	38.9895	0.42735	15	0.101701	9.73333	11.1262
MMP1	34.923	0.423729	15	0.102708	9.46667	11.4119
PSEN2	94.8948	0.361446	9	0.0218846	4.88889	6.19643
PSENEN	1.03739	0.309917	7	0.0104067	5.71429	6.66667
APH1A	25.8761	0.319829	8	0.0111183	5.25	6.28571
MMP9	340.269	0.470219	31	0.186199	12.129	22.351
PSEN1	553.013	0.422535	14	0.0648581	5.71429	8.81566
BACE1	197.945	0.397878	10	0.0430305	5.8	7.55754
PDE4D	3.01504	0.363196	2	0.0119908	0	0
SLC6A2	298	0.282486	2	0.000698	0	0
ALOX12	2.22051	0.313808	2	0.00377746	0	0
APH1B	47.4979	0.320513	8	0.00934359	4	4.80952
VWF	274.548	0.421348	15	0.0861223	6.8	8.02273
AGTR1	6.02937	0.386598	6	0.0511692	3.66667	4.4
SERPINE1	49.096	0.433526	17	0.117545	10	12.8362
MAPK10	179.475	0.406504	11	0.0673869	5.09091	5.83333
YARS	254.236	0.375	9	0.0139704	1.77778	2.58333
AMD1	18.0968	0.351288	6	0.0125791	2.33333	2.8
EIF4H	129.869	0.35461	8	0.0150612	2.5	3.35714
LGALS3	425.64	0.436047	15	0.0948639	6	7.66429
MTRR	13.5382	0.34965	5	0.0115532	2	2.5
CTH	128.99	0.353774	7	0.00898677	1.14286	1.6
DNMT1	399.081	0.460123	21	0.138553	9.52381	11.4022
HMOX1	566.69	0.446429	16	0.0937713	6.375	7.45458
GSTZ1	22.0786	0.334076	5	0.00881577	2	2.58333
PMP2	0	0.30426	1	0.00332026	0	0
UAP1	368.616	0.331858	7	0.0080962	1.42857	2.66667
PRDX6	37.7957	0.364964	4	0.0199561	1	1.33333
HK1	383.747	0.393701	9	0.0391353	2.44444	3.91667
HK2	463.55	0.421348	12	0.0761504	4.66667	5.72348
ALK	126.982	0.422535	10	0.0746707	4.8	5.33333
PABPC1	472.924	0.383632	10	0.0263369	3	4.60317
FOXM1	45.9692	0.414365	16	0.113892	10.25	11.7134
FGFR1	19.0719	0.418994	12	0.0912639	7.16667	8.04167
ANXA3	2.35204	0.382653	4	0.0360703	2	2.66667
S100A6	8.04905	0.390625	5	0.034855	2	2.58333
AURKA	97.9664	0.432277	18	0.123774	10.8889	12.7402
FGF2	151.594	0.445104	25	0.155018	11.28	17.6549
MKI67	138.69	0.434783	19	0.137848	11.1579	12.9609
TYMP	204.257	0.426136	12	0.0557709	4.16667	4.875
TK1	634.784	0.423729	16	0.0619801	4.375	5.29318
CCNA1	9.74624	0.388601	12	0.0733445	8.5	9.54545
SKP1	103.209	0.404313	13	0.071966	5.84615	7.50379
CHEK1	45.9122	0.423729	19	0.13515	12.4211	14.8391
TOP2A	122.016	0.429799	18	0.114222	9.88889	11.6256
NDC80	1.07515	0.337079	9	0.0505554	7.33333	8.25
GOT1	54.599	0.339367	6	0.00812982	1.33333	1.65
BLVRA	3.282	0.330396	2	0.00548161	0	0
BTK	62.57	0.421348	9	0.0644314	4	4.5
GTF2I	69.8662	0.35461	6	0.0217259	0.333333	0.4
CA13	0	0.213068	2	3.55e-05	1	2
CA3	592	0.269784	3	0.000738	0.666667	2
CA7	0	0.213068	2	3.55e-05	1	2
CA14	0	0.205198	1	1.42e-05	0	0
CA4	298	0.257732	2	0.000309	0	0
MB	891.299	0.364964	4	0.0159964	0.5	0.666667
CA6	0	0.265957	1	0.000531	0	0
LYZ	314.426	0.361446	3	0.0115527	0	0
MMP13	0	0.40107	7	0.0612116	6	7
KPNB1	62.8211	0.391645	7	0.0432413	4	4.66667
ESR2	32.411	0.432277	13	0.10485	8.30769	9.56667
MAPK9	31.5344	0.429799	11	0.0833696	7.09091	8
FLI1	3.09559	0.345622	4	0.0251796	1.5	2
CD14	29.97	0.364964	6	0.0267541	2	2.4
LBP	1.83333	0.362319	6	0.0365381	4	4.8
F13A1	3.28603	0.326797	3	0.0118685	0.666667	1
FGF1	53.3772	0.421348	13	0.0885413	7.23077	8.4184
MAP3K7	69.3426	0.398936	7	0.0361313	2.28571	2.7
CD1A	0	0.352113	1	0.0102551	0	0
SATB2	0	0.328947	2	0.0144803	1	2
CPSF3	0	0.277778	1	0.00121054	0	0
CSDE1	4.33333	0.286807	3	0.00257737	0.666667	1
METAP2	106.036	0.364078	4	0.0146626	0.5	0.666667
ECE1	3.45937	0.3125	2	0.00536687	0	0
HNRNPR	313.659	0.363196	7	0.0268944	3.14286	3.66667
FBP1	73.5889	0.402145	7	0.0371648	2.85714	3.36667
GBA	530.398	0.403226	6	0.0276818	1	1.8
MAN2B1	16.5697	0.300601	3	0.00174346	0.666667	1
GAA	98.8773	0.33557	5	0.0085991	0.4	0.5
WARS	20.4541	0.334821	5	0.00677854	1.6	2
PDCD11	22.5534	0.350467	5	0.00991819	2	2.5
HBB	122.636	0.394737	4	0.0303808	1.5	2
HCAR2	0	0.352113	1	0.0102551	0	0
MAGEA4	2.75168	0.333333	2	0.00955699	0	0
NAGK	0	0.289575	2	0.00217004	1	2
VPS4B	0	0.29703	1	0.00350321	0	0
STRBP	0	0.266904	1	0.00123627	0	0
PRKD2	0	0.347222	1	0.0105981	0	0
SHFM1	0	0.347222	1	0.0105981	0	0
LGALS9	0	0.357995	2	0.0146164	1	2
PTPN13	25.6153	0.314465	4	0.00553572	0.5	0.833333
METTL16	0	0.298211	1	0.00284395	0	0
MGEA5	97.9146	0.40107	4	0.0279033	1.5	2
NMRK1	1.73333	0.30303	3	0.00257529	1.33333	2
USH1C	0	0.234742	1	0.00018	0	0
SEC23A	0	0.249584	1	0.000371	0	0
SSTR2	0	0.220588	1	3.19e-05	0	0

## Sheet: score2
Betweenness	Closeness	Degree	Eigenvector	Information	LAC	name	Network	selected	shared name	Subgragh
0.4	0.531646	6	0.0899121	4.45399	4.33333	ALK	5.2	FALSE	ALK	140254
2.99512	0.545455	8	0.10436	5.14805	5	HK2	5.71429	FALSE	HK2	188953
15.9388	0.608696	16	0.181224	6.92556	9.75	CCNA2	12.0217	FALSE	CCNA2	569794
18.6524	0.552632	10	0.0796896	5.71475	4.6	TK1	5.66865	FALSE	TK1	110212
26.992	0.636364	18	0.192693	7.22081	9.55556	PSD-95	12.9146	FALSE	PSD-95	644192
11.1829	0.552632	8	0.0691679	5.14805	3.75	TYMP	4.47619	FALSE	TYMP	83019.5
0.953907	0.545455	8	0.0967801	5.14805	6.25	CYP2E1	7.14286	FALSE	CYP2E1	162512
28.084	0.6	14	0.13977	6.58454	6.71429	HSPA8	8.7325	FALSE	HSPA8	338940
108.914	0.736842	27	0.260917	8.17273	10.963	SYN	21.6794	FALSE	SYN	1.18107e+06
13.3919	0.512195	7	0.0488208	4.81949	1.71429	AHCY	2.06667	FALSE	AHCY	41364
6.98165	0.494118	6	0.0334674	4.45399	2	ADA	2.4	FALSE	ADA	19448.1
119.263	0.711864	25	0.235177	8.00143	10	TNF	19.8052	FALSE	TNF	959554
14.7823	0.591549	14	0.162749	6.58454	9	MKI67	10.3475	FALSE	MKI67	459539
11.4071	0.6	14	0.163122	6.58454	8.85714	MAPK8	10.8892	FALSE	MAPK8	461644
9.69087	0.591549	14	0.164186	6.58454	8.57143	ABL1	9.89316	FALSE	ABL1	467685
5.43695	0.56	10	0.112148	5.71475	6.2	HMOX1	7.30159	FALSE	HMOX1	218218
27.1298	0.608696	15	0.167024	6.76142	8.26667	DNMT1	9.76301	FALSE	DNMT1	483996
0.333333	0.5	5	0.0564871	4.04498	3.6	BACE1	4.5	FALSE	BACE1	55365.4
120.044	0.736842	27	0.257026	8.17273	10.6667	HSP90AA1	21.349	FALSE	HSP90AA1	1.14611e+06
12.1458	0.6	14	0.159801	6.58454	8.85714	FGF2	10.4831	FALSE	FGF2	443049
3.72074	0.531646	7	0.0802555	4.81949	4.28571	PSEN1	5.43333	FALSE	PSEN1	111754
134.146	0.777778	30	0.281175	8.39894	11.3333	CASP3	25.8493	FALSE	CASP3	1.3716e+06
6.97492	0.575342	12	0.14252	6.18619	8.16667	AURKA	9.44646	FALSE	AURKA	352414
22.6255	0.583333	12	0.134269	6.18619	6.33333	MGMT	7.22146	FALSE	MGMT	312780
25.4727	0.626866	17	0.187315	7.07831	9.52941	MMP9	12.4519	FALSE	MMP9	608732
4.66752	0.545455	9	0.101055	5.44503	5.33333	AKR1B1	6.14286	FALSE	AKR1B1	177183
11.5418	0.567568	10	0.121954	5.71475	6.8	LGALS3	7.63889	FALSE	LGALS3	258041
196.593	0.792453	31	0.278764	8.46729	10.5806	EGFR	25.437	FALSE	EGFR	1.34817e+06
258.556	0.857143	35	0.307603	8.7115	11.6	TP53	32.1031	FALSE	TP53	1641539
13.3293	0.608696	15	0.171285	6.76142	9.06667	KDR	11.3335	FALSE	KDR	509005
8.31929	0.591549	13	0.155487	6.3934	8.30769	ABCB1	9.60335	FALSE	ABCB1	419444
6.17021	0.6	14	0.172948	6.58454	9.71429	HDAC1	10.896	FALSE	HDAC1	518933
7.54476	0.583333	12	0.13296	6.18619	7.5	TOP2A	8.28283	FALSE	TOP2A	306726
0.2	0.518519	5	0.06918	4.04498	3.6	MAPK10	4.5	FALSE	MAPK10	83033.9
2.00526	0.512195	6	0.0659298	4.45399	3.66667	ADAM17	4.55	FALSE	ADAM17	75420.8
5.68159	0.567568	10	0.112248	5.71475	5.4	IDH1	6.3619	FALSE	IDH1	218597
7.35031	0.525	7	0.0450881	4.81948	3.14286	CDA	3.73333	FALSE	CDA	35295
0.869048	0.506024	6	0.0732532	4.45399	4	SKP1	4.8	FALSE	SKP1	93105.8
4.45791	0.56	9	0.112673	5.44503	5.55556	PTPN1	6.25	FALSE	PTPN1	220255
15.7186	0.538462	9	0.0579074	5.44503	3.33333	GART	4.60357	FALSE	GART	58205.6
1.35309	0.56	9	0.120502	5.44503	6.88889	ACTA1	7.75	FALSE	ACTA1	251925
1.78279	0.538462	9	0.101545	5.44503	6.66667	VWF	7.5	FALSE	VWF	178915
8.1991	0.512195	7	0.0367737	4.81948	3.14286	PNP	3.76667	FALSE	PNP	23487.2
